# Supplementary material for: Adolescent Sport Participation and Age at Menarche in Relation to Midlife Body Composition, Bone Mineral Density, Fitness, and Physical Activity
Source: MDPI journal article supplement (doi:10.3390/jcm9123797), 2020-11-24
Supplement: s1 [file s1]

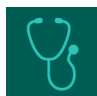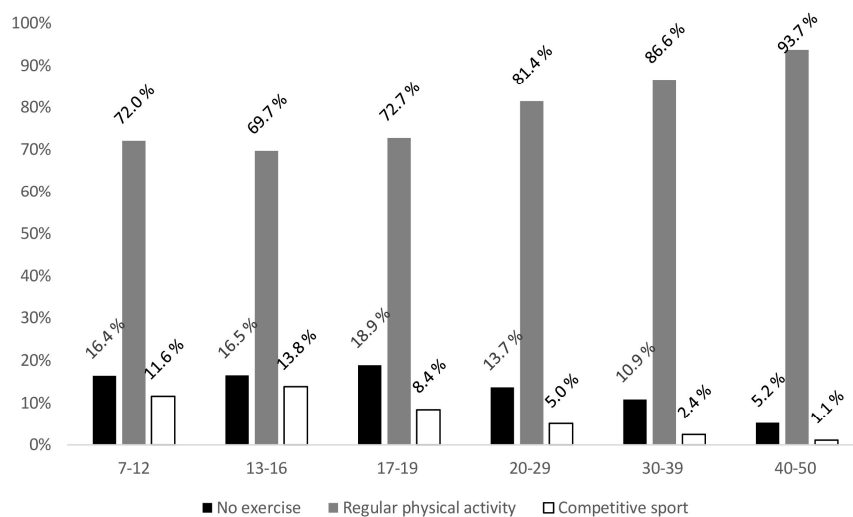

Figure S1. Proportions of the participants in different physical activity level groups across the age categories.

**Table S1.** Age at menarche among participants ( $n = 1081$ ).

| Age at menarche | Number of participants | Proportion of participants |
|-----------------|------------------------|----------------------------|
| 9               | 2                      | 0.2%                       |
| 10              | 15                     | 1.4%                       |
| 11              | 113                    | 10.5%                      |
| 12              | 261                    | 24.1%                      |
| 13              | 377                    | 34.9%                      |
| 14              | 192                    | 17.8%                      |
| 15              | 81                     | 7.5%                       |
| 16              | 30                     | 2.8%                       |
| 17              | 8                      | 0.7%                       |
| 18              | 1                      | 0.1%                       |
| 19              | 1                      | 0.1%                       |

**Table S2.** Proportion ( $n$ ) of the participants reporting fractures, musculoskeletal disorders/symptoms, and anorexia nervosa diagnosis according to physical activity (PA) level at the age of 13–16.

|                                  | Competitive sport ( $n = 136$ ) | Regular PA ( $n = 689$ ) | No exercise ( $n = 163$ ) | $p$ -value |
|----------------------------------|---------------------------------|--------------------------|---------------------------|------------|
| Fracture                         | 17.6% (24)                      | 15.5% (107)              | 17.2% (28)                | 0.761      |
| Musculoskeletal disorder/symptom | 43.4% (59)                      | 37.4% (258)              | 31.9% (52)                | 0.123      |
| Anorexia nervosa                 | 0.7% (1)                        | 0.6% (4)                 | 0.0% (0)                  | 0.641      |

Data are presented as percentages (frequencies).

**Table S3.** Proportion ( $n$ ) of the participants reporting fractures, musculoskeletal disorders/symptoms, and anorexia nervosa diagnosis according to age at menarche (AAM) groups.

|                                  | AAM $\leq 12$ ( $n = 391$ ) | AAM = 13 ( $n = 377$ ) | AAM $\geq 14$ ( $n = 313$ ) | $p$ -value |
|----------------------------------|-----------------------------|------------------------|-----------------------------|------------|
| Fracture                         | 16.6% (65)                  | 17.2% (65)             | 14.4% (45)                  | 0.571      |
| Musculoskeletal disorder/symptom | 36.6% (143)                 | 37.9% (143)            | 38.0% (119)                 | 0.901      |
| Anorexia nervosa                 | 0.0% (0) <sup>a</sup>       | 0.5% (2) <sup>b</sup>  | 1.3% (4)                    | 0.069      |

Data are presented as percentages (frequencies). <sup>a</sup>  $n = 390$ ; <sup>b</sup>  $n = 376$ .
